# Supplementary material
Source: publisher figshare collection journal article supplement (https://acs.figshare.com/ndownloader/files/19354607)
Supplement: Supplementary file 1 [file 19354607]

# Supporting Information

## Novel Benzohydroxamate-Based Potent and Selective Histone Deacetylase 6 (HDAC6) Inhibitors Bearing a Pentaheterocyclic Scaffold: Design, Synthesis and Biological Evaluation

*Barbara Vergani, Giovanni Sandrone, Mattia Marchini, Chiara Ripamonti, Edoardo Cellupica, Elisabetta Galbiati, Gianluca Caprini, Gianfranco Pavich, Giulia Porro, Ilaria Rocchio, Maria Lattanzio, Marcello Pezzuto, Malgorzata Skorupska, Paola Cordella, Paolo Pagani, Pietro Pozzi, Roberta Pomarico, Daniela Modena, Flavio Leoni, Raffaella Perego, Gianluca Fossati, Christian Steinkühler and Andrea Stevenazzi\**

Preclinical R&D, Italfarmaco Group, Via dei Lavoratori 54, I-20092 Cinisello Balsamo, Milan,  
Italy

## Table of Contents

|                                                                                                                                                                        |     |
|------------------------------------------------------------------------------------------------------------------------------------------------------------------------|-----|
| <i>In vitro</i> determination of specific HDAC6 inhibitory activity (data related to Figure 8).....                                                                    | S3  |
| <i>In vivo</i> determination of specific HDAC6 inhibitory activity (data related to Figure 9).....                                                                     | S4  |
| Six-membered heteroaromatic central scaffold compounds.....                                                                                                            | S5  |
| Repeats of enzyme assay IC <sub>50</sub> determination (for key compounds) and standard deviations. ....                                                               | S6  |
| Repeats of cytotoxicity on PBMC and on 697 B-precursor acute lymphoblastic leukemia (B-Pre-ALL) cell line experiments (on key compounds) and standard deviations ..... | S8  |
| Homology model protocol .....                                                                                                                                          | S11 |
| Docking protocol .....                                                                                                                                                 | S11 |
| Comparison between the best docking poses of compound 35 (Figure 7), Bavarostat and ACY-1083 into HDAC6 active site.....                                               | S12 |
| HPLC chromatograms of key compounds.....                                                                                                                               | S14 |

***In vitro* determination of specific HDAC6 inhibitory activity (data related to Figure 8)**

**Table S1** - Tubulin and H3 acetylation in human 697 B-precursor acute lymphoblastic leukemia (B-Pre-ALL) cell line.

|            | $\alpha$ -tubulin <sup>a</sup> |      |      |      | H3 <sup>a</sup> |      |      |
|------------|--------------------------------|------|------|------|-----------------|------|------|
|            | Conc (nM)                      |      |      |      | Conc (nM)       |      |      |
| compd      | 1000                           | 333  | 111  | 37   | 1000            | 333  | 111  |
| 13         | 16±2                           | 13±1 | 7±1  | 3±1  | 2±1             | 1±1  | 1±1  |
| 29         | 7±1                            | 6±1  | 4±1  | 2±1  | 8±3             | n.a. | n.a. |
| 34         | 6±1                            | 4±1  | 3±1  | 2±1  | 1±1             | 1±1  | 1±1  |
| 35         | 11±1                           | 8±1  | 3±1  | 2±1  | 3±1             | n.a. | n.a. |
| 39         | 22±1                           | 20±1 | 19±1 | 10±1 | 2±1             | 3±1  | 1±1  |
| 42         | 14±3                           | 9±2  | 3±1  | 2±1  | 3±1             | 2±1  | 1±1  |
| 43         | 12±2                           | 9±1  | 4±1  | 3±1  | 1±1             | 1±1  | 1±1  |
| 44         | 10±2                           | 9±2  | 8±1  | 3±1  | 2±1             | 2±1  | 1±1  |
| 45         | 17±1                           | 21±1 | 15±1 | 7±1  | 1±1             | 1±1  | 1±1  |
| 47         | 14±1                           | 10±1 | 11±1 | 6±1  | 1±1             | n.a. | n.a. |
| 48         | 7 ±1                           | 5±1  | 2±1  | 2±1  | 2±1             | 1±1  | 1±1  |
| 49         | 19±1                           | 15±1 | 7±1  | 2±1  | 1±1             | n.a. | n.a. |
| Givinostat | 13±1                           | 9±1  | 3±1  | 2±1  | 23±7            | 17±5 | 8±3  |

a. *fold increase* of the ratio of acetylated tubulin and total tubulin and of acetylated H3 and total H3 ratio towards control. The test has been carried out in dose/response (4-points for tubulin and 3-points for histone H3) starting from 1  $\mu$ M with 3-fold serial dilution (3 technical replicates).

n.a. not available.

## ***In vivo* determination of specific HDAC6 inhibitory activity (data related to Figure 9)**

**Table S2** - Levels of tubulin and histone H3 acetylation and concentrations of compound **42** in the spleen and in plasma of mice following oral administration of the inhibitor (data presented in Figure 9A).

| <b>Time</b><br>(hrs) | <b>Ac-tubulin</b>                 | <b>Ac-H3</b>    | <b>Compound 42</b><br><b>concentration</b> | <b>Compound 42</b><br><b>plasma</b><br><b>concentration</b> |
|----------------------|-----------------------------------|-----------------|--------------------------------------------|-------------------------------------------------------------|
|                      | Fold increase (average $\pm$ sem) |                 | (ng/g spleen)                              | (ng/ml)                                                     |
| 1                    | 10.54 $\pm$ 0.97                  | 2.03 $\pm$ 0.38 | 1357 $\pm$ 492                             | 958 $\pm$ 362                                               |
| 4                    | 1.68 $\pm$ 0.21                   | 0.83 $\pm$ 0.07 | 106.1 $\pm$ 26.6                           | 17.8 $\pm$ 3.3                                              |
| 24                   | 0.84 $\pm$ 0.02                   | 0.72 $\pm$ 0.05 | 17.1 $\pm$ 2.6                             | 0.7 $\pm$ 0.4                                               |

**Table S3** - Levels of tubulin and histone H3 acetylation and concentrations of compound **13** in the spleen and in plasma of mice following oral administration of the inhibitor (data presented in Figure 9B).

| <b>Time</b><br>(hrs) | <b>Ac-tubulin</b>                 | <b>Ac-H3</b>    | <b>Compound 13</b><br><b>concentration</b> | <b>Compound 13</b><br><b>plasma</b><br><b>concentration</b> |
|----------------------|-----------------------------------|-----------------|--------------------------------------------|-------------------------------------------------------------|
|                      | Fold increase (average $\pm$ sem) |                 | (ng/g spleen)                              | (ng/ml)                                                     |
| 1                    | 11.04 $\pm$ 1.25                  | 3.12 $\pm$ 0.59 | 6140 $\pm$ 1583                            | 1989 $\pm$ 638                                              |
| 4                    | 1.94 $\pm$ 0.21                   | 1.14 $\pm$ 0.04 | 109.2 $\pm$ 24.1                           | 16.0 $\pm$ 4.8                                              |
| 24                   | 0.80 $\pm$ 0.04                   | 0.85 $\pm$ 0.05 | 17.5 $\pm$ 3.3                             | 1.3 $\pm$ 0.1                                               |

## Six-membered heteroaromatic central scaffold compounds

Some compounds bearing a six-membered heteroaromatic ring as a central scaffold were synthesized and tested. These compounds show quite low potency in HDAC6 inhibitory activity compared to compounds with five-membered heteroaromatic ring core, even if they retain a certain selectivity toward HDAC3.

**Table S4** – Enzymatic activity of some Six-membered heteroaromatic central scaffold compounds

| Compd code | Structure                                                                           | HDAC6 IC <sub>50</sub> (nM) <sup>a</sup> | HDAC3 IC <sub>50</sub> (nM) <sup>a</sup> | Selectivity (HDAC3 IC <sub>50</sub> /HDAC6 IC <sub>50</sub> ) |
|------------|-------------------------------------------------------------------------------------|------------------------------------------|------------------------------------------|---------------------------------------------------------------|
| ITF3858    | 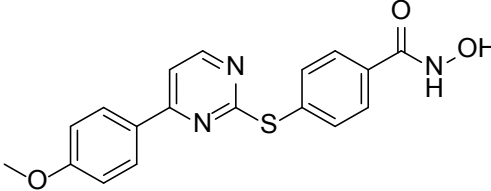  | 621±16                                   | 5414±95                                  | 8.7                                                           |
| ITF3857    |  | 701±8                                    | 6691±154                                 | 9.5                                                           |
| ITF3743    |  | 129±2                                    | 1558±31                                  | 12.1                                                          |

a - Enzymatic data (IC<sub>50</sub>) in nM unit were obtained from curve-fitting of a 5-point enzymatic assay starting from 100, 30 or 10 µM with 10-fold serial dilution. Experiments were done in triplicate (single experiment). SDs were calculated on technical replicates.

**Repeats of enzyme assay IC<sub>50</sub> determination (for key compounds) and standard deviations.**

**Table S5** – IC<sub>50</sub> calculation - Single experiments results

| Enzyme | Compd | IC <sub>50</sub> (nM) |      |      |      | Mean | Std Dev | repeats |
|--------|-------|-----------------------|------|------|------|------|---------|---------|
| HDAC6  | 13    | 9                     | 8    | 8    |      | 8    | 1       | 3       |
|        | 29    | 8                     | 8    | 5    |      | 7    | 1       | 3       |
|        | 33    | 8                     | 7    | 7    |      | 7    | 1       | 3       |
|        | 34    | 6                     | 5    | 5    |      | 5    | 1       | 3       |
|        | 35    | 3                     | 5    | 2    |      | 3    | 2       | 3       |
|        | 39    | 6                     | 8    | 4    |      | 6    | 2       | 3       |
|        | 42    | 27                    | 15   | 15   | 9    | 17   | 8       | 4       |
|        | 43    | 9                     | 8    | 9    |      | 9    | 1       | 3       |
|        | 44    | 4                     | 4    | 1    |      | 3    | 2       | 3       |
|        | 45    | 4                     | 2    | 6    |      | 4    | 2       | 3       |
|        | 46    | 5                     | 4    | 6    |      | 5    | 1       | 3       |
|        | 47    | 5                     | 6    | 6    |      | 6    | 1       | 3       |
|        | 48    | 6                     | 9    | 15   |      | 10   | 4       | 3       |
|        | 49    | 11                    | 13   | 16   |      | 13   | 3       | 3       |
| HDAC3  | 13    | 487                   | 532  | 493  |      | 504  | 24      | 3       |
|        | 29    | 974                   | 1026 | 681  | 804  | 871  | 158     | 4       |
|        | 33    | 6510                  | 7831 | 6680 | 6357 | 6845 | 671     | 4       |
|        | 34    | 5988                  | 5243 | 4306 |      | 5179 | 843     | 3       |
|        | 35    | 641                   | 750  | 617  |      | 669  | 71      | 3       |
|        | 39    | 2470                  | 2803 | 2450 |      | 2574 | 198     | 3       |
|        | 42    | 979                   | 794  | 712  | 975  | 865  | 134     | 4       |

|              |           |       |       |       |      |       |      |   |
|--------------|-----------|-------|-------|-------|------|-------|------|---|
|              | <b>43</b> | 2827  | 2074  | 1871  | 1606 | 2095  | 524  | 4 |
|              | <b>44</b> | 2635  | 2273  | 2348  |      | 2419  | 191  | 3 |
|              | <b>45</b> | 1776  | 1870  | 1885  | 1584 | 1779  | 138  | 4 |
|              | <b>46</b> | 2608  | 2729  | 1887  |      | 2408  | 455  | 3 |
|              | <b>47</b> | 3005  | 2661  | 2669  |      | 2778  | 196  | 3 |
|              | <b>48</b> | 2936  | 3635  | 3741  | 3851 | 3541  | 413  | 4 |
|              | <b>49</b> | 13717 | 10953 | 10382 | 8614 | 10917 | 2116 | 4 |
| <b>HDAC1</b> | <b>13</b> | 1015  | 1004  |       |      | 1010  | 8    | 2 |
|              | <b>29</b> | 812   | 1047  |       |      | 929   | 166  | 2 |
|              | <b>33</b> | 7512  | 6768  |       |      | 7140  | 526  | 2 |
|              | <b>34</b> | 4447  | 3472  |       |      | 3960  | 689  | 2 |
|              | <b>35</b> | 1425  | 700   |       |      | 1063  | 513  | 2 |
|              | <b>39</b> | 2898  | 2436  |       |      | 2667  | 327  | 2 |
|              | <b>42</b> | 1094  | 953   | 829   | 820  | 924   | 129  | 4 |
|              | <b>43</b> | 3991  | 4288  |       |      | 4140  | 210  | 2 |
|              | <b>44</b> | 2517  | 2107  |       |      | 2312  | 290  | 2 |
|              | <b>45</b> | 2878  | 2983  |       |      | 2931  | 74   | 2 |
|              | <b>46</b> | 3659  | 4677  |       |      | 4168  | 720  | 2 |
|              | <b>47</b> | 3182  | 3452  |       |      | 3317  | 191  | 2 |
|              | <b>48</b> | 5162  | 5269  |       |      | 5216  | 76   | 2 |
|              | <b>49</b> | 7377  | 8838  |       |      | 8107  | 1033 | 2 |

**Repeats of cytotoxicity on PBMC and on 697 B-precursor acute lymphoblastic leukemia (B-Pre-ALL) cell line experiments (on key compounds) and standard deviations**

**Table S6 – Cytotoxicity on PBMC**

| <b>Compd</b>      | <b>PBMC<br/>cytotoxicity<br/>(nM)</b> | <b>Standard<br/>deviation</b> | <b>repeats</b> |
|-------------------|---------------------------------------|-------------------------------|----------------|
| <b>13</b>         | 5857                                  | 4230                          | 6              |
| <b>29</b>         | 4274                                  | 3507                          | 6              |
| <b>33</b>         | >10000                                | -                             | 2              |
| <b>34</b>         | 7387                                  | 7608                          | 4              |
| <b>35</b>         | 5524                                  | 6334                          | 2              |
| <b>39</b>         | >10000                                | -                             | 2              |
| <b>42</b>         | 5387                                  | 5128                          | 5              |
| <b>43</b>         | >10000                                | -                             | 3              |
| <b>44</b>         | >10000                                | -                             | 3              |
| <b>45</b>         | >10000                                | -                             | 1              |
| <b>46</b>         | >10000                                | -                             | 3              |
| <b>47</b>         | 5987                                  | 3892                          | 3              |
| <b>48</b>         | 7445                                  | 6210                          | 3              |
| <b>49</b>         | 3963                                  | 4108                          | 5              |
| <b>Givinostat</b> | 313                                   |                               |                |



**Table S7** – Cytotoxicity on 697 B-precursor acute lymphoblastic leukemia (B-Pre-ALL) cell line

| <b>Compd</b>      | <b>697 cell line<br/>cytotoxicity<br/>(nM)</b> | <b>Standard<br/>deviations</b> | <b>repeats</b> |
|-------------------|------------------------------------------------|--------------------------------|----------------|
| <b>13</b>         | >10000                                         | -                              | 3              |
| <b>29</b>         | 3634                                           | 2271                           | 6              |
| <b>33</b>         | >10000                                         | -                              | 5              |
| <b>34</b>         | >10000                                         | -                              | 7              |
| <b>35</b>         | 6489                                           | 2603                           | 6              |
| <b>39</b>         | >10000                                         | -                              | 3              |
| <b>42</b>         | 8934                                           | 5531                           | 6              |
| <b>43</b>         | 5506                                           | 3031                           | 4              |
| <b>44</b>         | 2749                                           | 1865                           | 7              |
| <b>45</b>         | >10000                                         | -                              | 6              |
| <b>46</b>         | 5983                                           | 2844                           | 5              |
| <b>47</b>         | >10000                                         | -                              | 5              |
| <b>48</b>         | >10000                                         | -                              | 4              |
| <b>49</b>         | >10000                                         | -                              | 3              |
| <b>Givinostat</b> | 100                                            |                                |                |

Both cytotoxicity test on 697 (B-Pre-AL) and hPBMC were performed in a concentration range between 10 and 10000 nM (Higher concentrations lead to phenomena which could compromise the assay, such as inhibitor precipitation). The IC<sub>50</sub> of the majority of tested compounds could not be determined, being higher than 10000 nM. The high standard deviations of the other compounds

are due to the closeness of the IC<sub>50</sub> value to the experiment highest dose. These data state that all the tested compounds are not cytotoxic.

**Cell cytotoxicity assay.** Cytotoxic activities of the compounds were evaluated in the human 697 promyelocytic B leukemia cell line (ACC 42, DSMZ- Deutsche Sammlung von Mikroorganismen und Zellkulturen) and on human peripheral blood mononuclear cells (PBMCs) using a commercial viability assay which measures the mitochondrial activity. 697 cells were plated at  $2 \times 10^4$  cells per well, and the compounds were added in concentrations ranging from 10 to 10000 nM. After 48 h of incubation, cell viability was evaluated with CellTiter 96® Aqueous One Solution Cell Proliferation Assay (Promega) according to the manufacturer's instructions.

hPBMC from healthy donors were separated by density gradient on Ficoll Hypaque.

PBMCs were plated at  $5 \times 10^5$  cell per well and compounds were added in a concentration range from 10 to 10000 nM. After 72 h of incubation, cell viability was evaluated as described before.

## Homology model protocol

The homology model h-HDAC6-CD2.pdb was prepared using "Build Homology Model" protocols available in Discovery Studio, and based on MODELER (Sali, A.; Blundell, T.L., *J. Mol. Biol.* **1993**, 234(3), 779-815.). Parameters are set to the default values suggested by supplier.

Sequences of templates (h-HDAC8: PDB code 1T64, h-HDAC2: PDB code 4LXZ and h-HDAC3: PDB code 4A69) and the portion of h-HDAC6 target of homology modeling (h-HDAC6-CD2, residues from 485 to 835, GenBank: AAH69243.1 - Ref. Strausberg et al., *Proc. Natl. Acad. Sci.* **2002**, 99, 16899-16903). Water molecules available in templates were removed, whereas all ligands coprecipitated with template were conserved and transferred to the model. Optimization level was set to the highest level.

## Docking protocol

Docking calculation were performed using libdoc protocol of Discovery Studio (DS) Suite, focusing the conformational search of candidates in a sphere centered in the center of mass of aligned inhibitors and having radius equal to 8.0 Å. The volume includes both L1 and L2 loops, the catalytic core, the zinc cation and its residue directly bound to the metal ion.

The best score function for poses ranking was detected in the preliminary calculation, where a training set of HDAC6 selective and pan inhibitors are mixed with compounds exhibiting low isoform 6 potency (at least 10-fold).

Final Receiving Operator Curves (ROC) were based on the Dreiding scores, which exhibited the highest number of true positive hits, on the basis of the top scoring function value.

**Comparison between the best docking poses of compound 35 (related to Figure 7), Bavarostat and ACY-1083 into HDAC6 active site.**

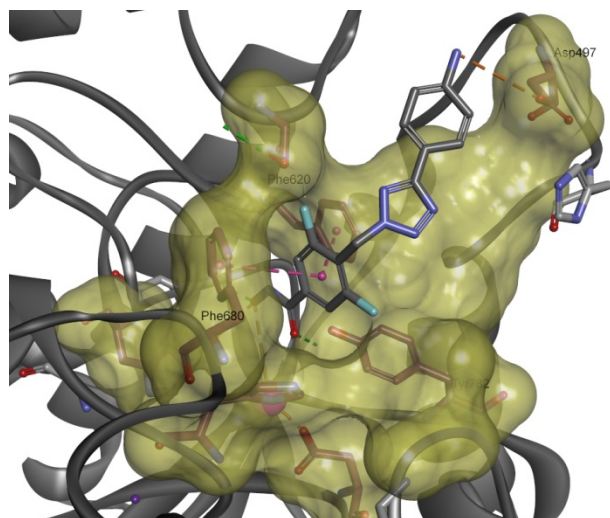

**Figure S1.1 (related to Figure 7).** Compound 35 h-CD-HDAC6 complex: conformer detected in the docking experiment. Protein PDB code: 5EDU

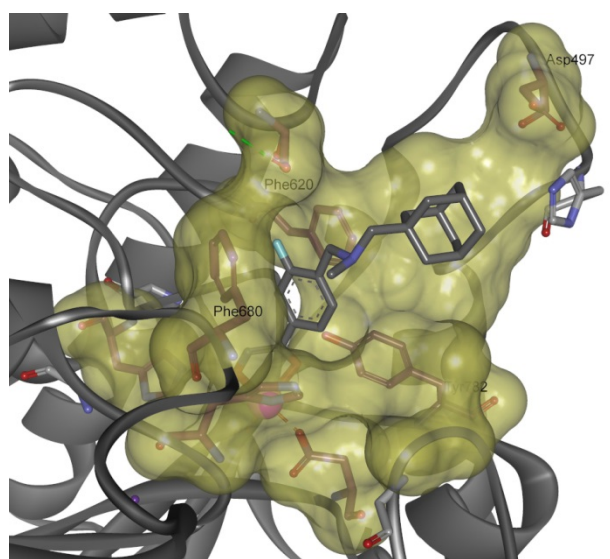

**Figure S1.2.** Bavarostat h-CD-HDAC6 virtual complex: the “binding” conformer was extracted from Bavarostat-z-CD2-HDAC6 complex (PDB code 6DVO), preliminary superimposed to h-CD2-HDAC6 (PDB code 5EDU) by using sequences alignment.

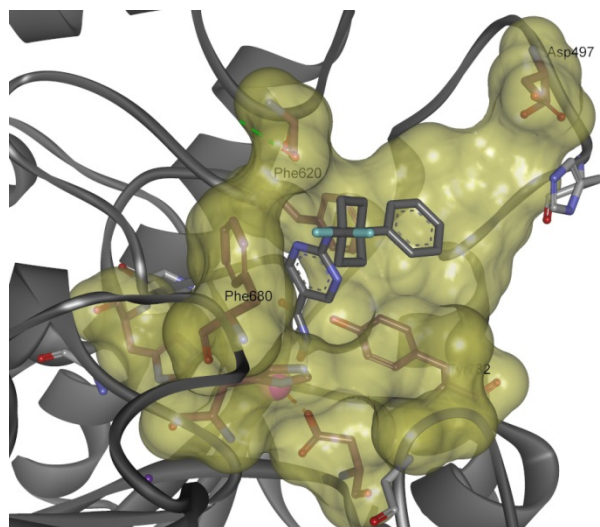

**Figure S1.3.** ACY-1083 h-CD-HDAC6 virtual complex: the “binding” conformer was extracted from ACY-1083-z-CD2-HDAC6 complex (PDB code 5WGM), preliminary superimposed to h-CD2-HDAC6 (PDB code 5EDU) by using sequences alignment.

# HPLC chromatograms of key compounds

## Compound 13

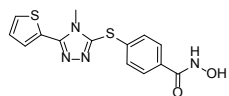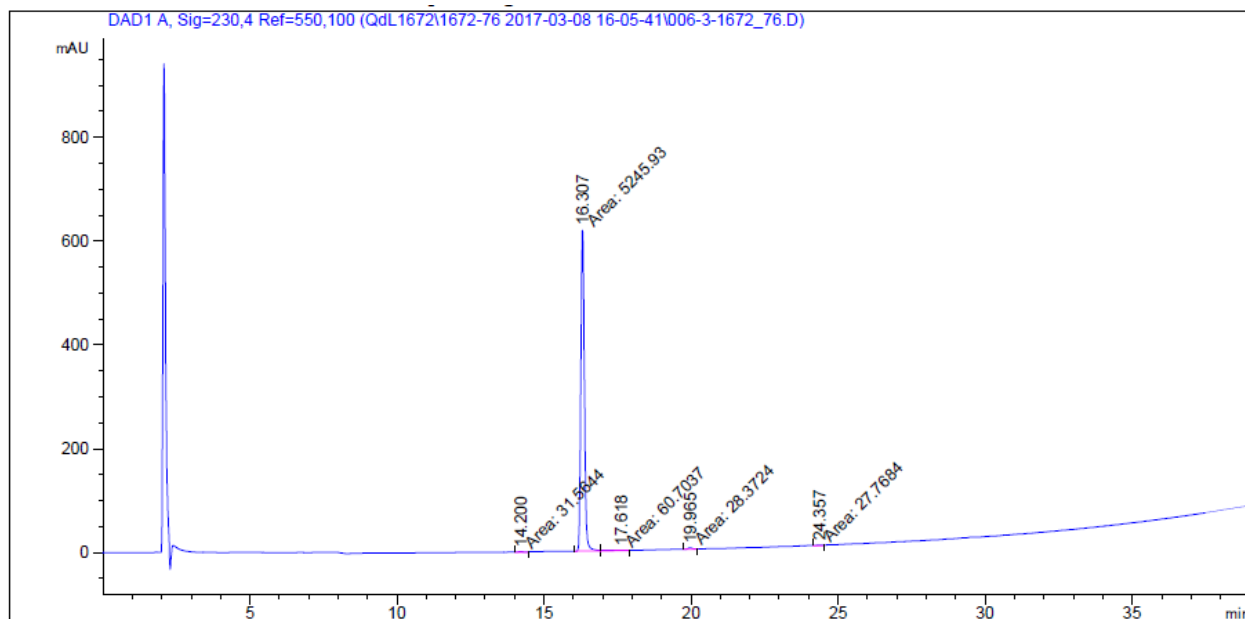

### Area Percent Report

Sorted By : Signal  
Multiplier : 1.0000  
Dilution : 1.0000  
Use Multiplier & Dilution Factor with ISTDs

Signal 1: DAD1 A, Sig=230,4 Ref=550,100

| Peak # | RetTime [min] | Type | Width [min] | Area [mAU*s] | Height [mAU] | Area %  |
|--------|---------------|------|-------------|--------------|--------------|---------|
| 1      | 14.200        | MM   | 0.3737      | 31.56440     | 1.40759      | 0.5851  |
| 2      | 16.307        | MF   | 0.1412      | 5245.92725   | 619.26727    | 97.2488 |
| 3      | 17.618        | FM   | 0.8307      | 60.70369     | 1.21788      | 1.1253  |
| 4      | 19.965        | MM   | 0.1715      | 28.37240     | 2.75685      | 0.5260  |
| 5      | 24.357        | MM   | 0.3163      | 27.76843     | 1.46313      | 0.5148  |

Totals : 5394.33616 626.11272

# Compound 29

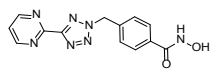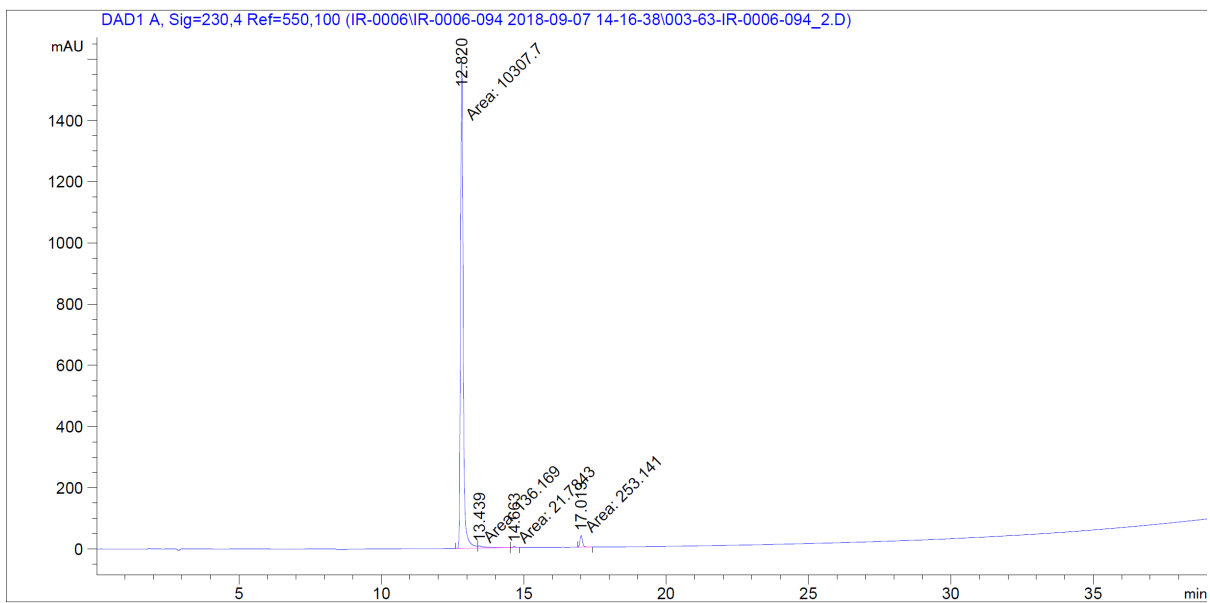

## Area Percent Report

Sorted By : Signal  
Multiplier : 1.0000  
Dilution : 1.0000  
Use Multiplier & Dilution Factor with ISTDs

Signal 1: DAD1 A, Sig=230,4 Ref=550,100

| Peak # | RetTime [min] | Type | Width [min] | Area [mAU*s] | Height [mAU] | Area %  |
|--------|---------------|------|-------------|--------------|--------------|---------|
| 1      | 12.820        | MF   | 0.1079      | 1.03077e4    | 1592.32324   | 96.1647 |
| 2      | 13.439        | FM   | 0.3375      | 136.16881    | 6.72462      | 1.2704  |
| 3      | 14.663        | MM   | 0.1033      | 21.78426     | 3.51447      | 0.2032  |
| 4      | 17.013        | MM   | 0.1082      | 253.14133    | 38.99165     | 2.3617  |

Totals : 1.07188e4 1641.55398

\*\*\* End of Report \*\*\*

# Compound 33

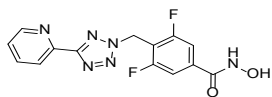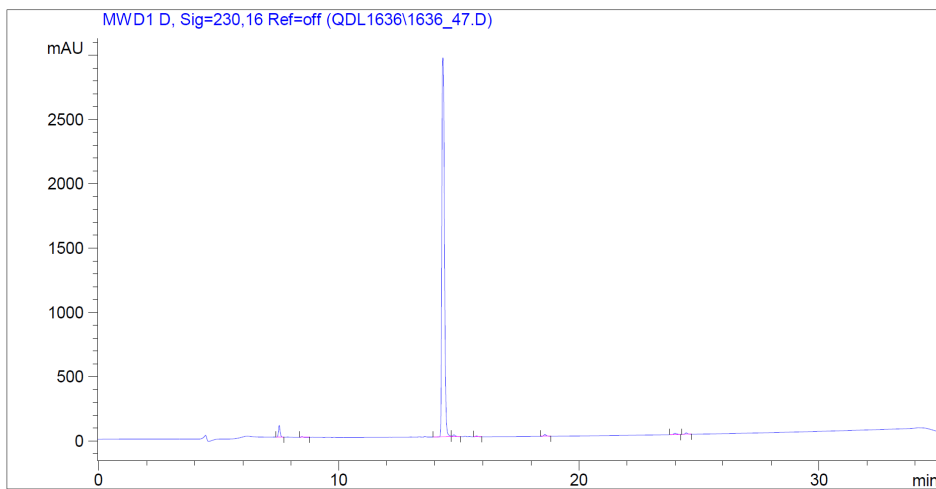

## AREA PERCENT REPORT

Sorted By : Retention Time  
Multiplier : 1.000000  
Dilution : 1.000000  
Use Multiplier & Dilution Factor with ISTDs

Signal 1 : MWD1 D, Sig=230,16 Ref=off

| Peak # | RetTime [min] | Type | Area [mAU*s] | Width [s] | Height [mAU] | Area % |
|--------|---------------|------|--------------|-----------|--------------|--------|
| 1      | 7.513         | BV   | 438.4840     | 0.074     | 91.381       | 1.873  |
| 2      | 8.460         | BB   | 29.0845      | 0.069     | 6.349        | 0.124  |
| 3      | 14.328        | BV   | 2.2477e4     | 0.121     | 2950.154     | 96.020 |
| 4      | 14.786        | VV   | 147.0223     | 0.123     | 16.631       | 0.628  |
| 5      | 15.727        | BB   | 43.1524      | 0.094     | 6.988        | 0.184  |
| 6      | 18.576        | BB   | 100.9549     | 0.108     | 14.001       | 0.431  |
| 7      | 23.995        | BB   | 88.4048      | 0.134     | 9.752        | 0.378  |
| 8      | 24.460        | BB   | 84.4804      | 0.115     | 11.134       | 0.361  |

Totals : 23408.943 3106.390

\*\*\* End of Report \*\*\*



O=C(O)C1=CC=C(C=C1C2=NN=C3C(=N2)C4=CC=CC=N4)C5=CC=C(C=C5)F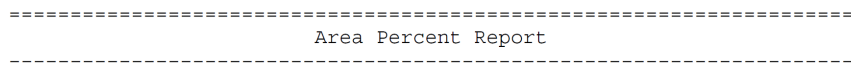

Signal 1: DAD1 A, Sig=230,4 Ref=550,100

S17

# Compound 35

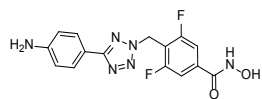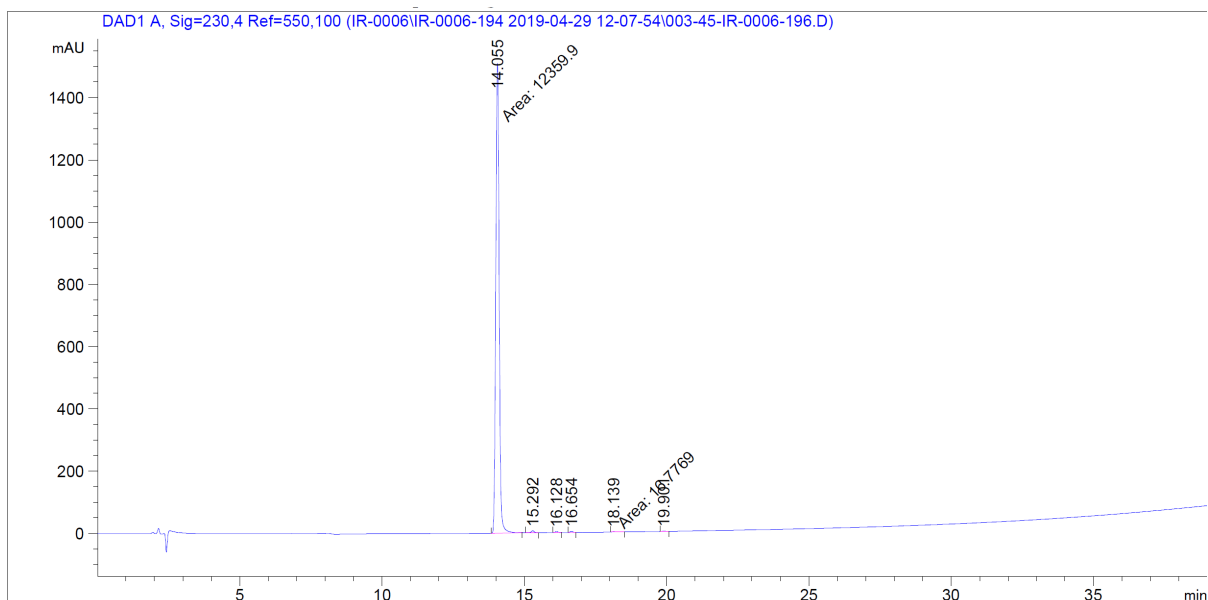

## Area Percent Report

Sorted By : Signal  
Multiplier : 1.0000  
Dilution : 1.0000  
Use Multiplier & Dilution Factor with ISTDs

Signal 1: DAD1 A, Sig=230,4 Ref=550,100

| Peak # | RetTime [min] | Type | Width [min] | Area [mAU*s] | Height [mAU] | Area %  |
|--------|---------------|------|-------------|--------------|--------------|---------|
| 1      | 14.055        | MM   | 0.1364      | 1.23599e4    | 1510.09155   | 99.0300 |
| 2      | 15.292        | BB   | 0.1167      | 48.12162     | 6.18687      | 0.3856  |
| 3      | 16.128        | BB   | 0.1035      | 23.01808     | 3.37705      | 0.1844  |
| 4      | 16.654        | BB   | 0.0960      | 25.01641     | 4.05269      | 0.2004  |
| 5      | 18.139        | MM   | 0.1979      | 16.77694     | 1.41315      | 0.1344  |
| 6      | 19.901        | BB   | 0.1106      | 8.12793      | 1.12135      | 0.0651  |

Totals : 1.24810e4 1526.24267

## Compound 39

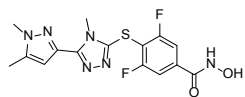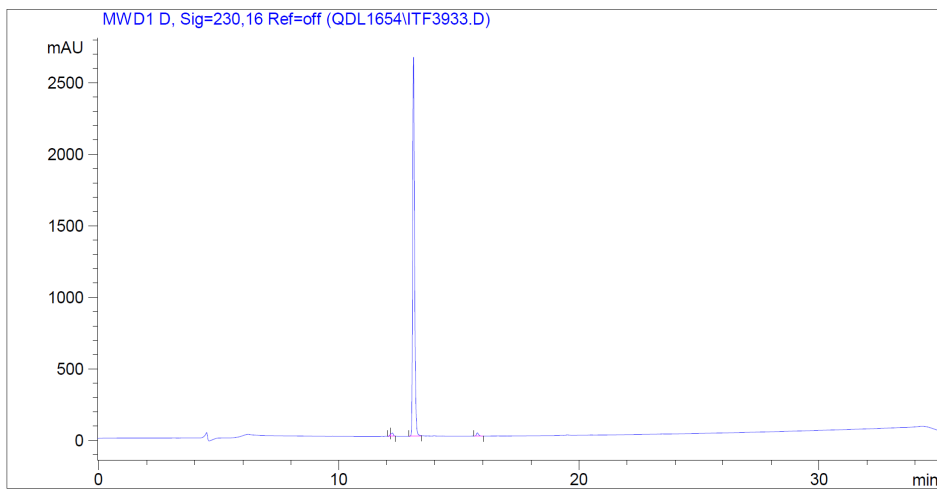

### AREA PERCENT REPORT

Sorted By : Retention Time  
Multiplier : 1.000000  
Dilution : 1.000000  
Use Multiplier & Dilution Factor with ISTDs

Signal 1 : MWD1 D, Sig=230,16 Ref=off

| Peak # | RetTime [min] | Type | Area [mAU*s] | Width [s] | Height [mAU] | Area % |
|--------|---------------|------|--------------|-----------|--------------|--------|
| 1      | 12.157        | BV   | 75.4362      | 0.058     | 19.781       | 0.501  |
| 2      | 12.226        | VB   | 117.5889     | 0.073     | 23.137       | 0.781  |
| 3      | 13.102        | BV   | 1.4711e4     | 0.085     | 2660.644     | 97.740 |
| 4      | 15.761        | VB   | 147.1682     | 0.096     | 23.239       | 0.978  |

Totals : 15051.009 2726.801

\*\*\* End of Report \*\*\*

# Compound 42

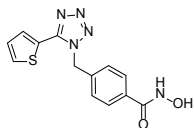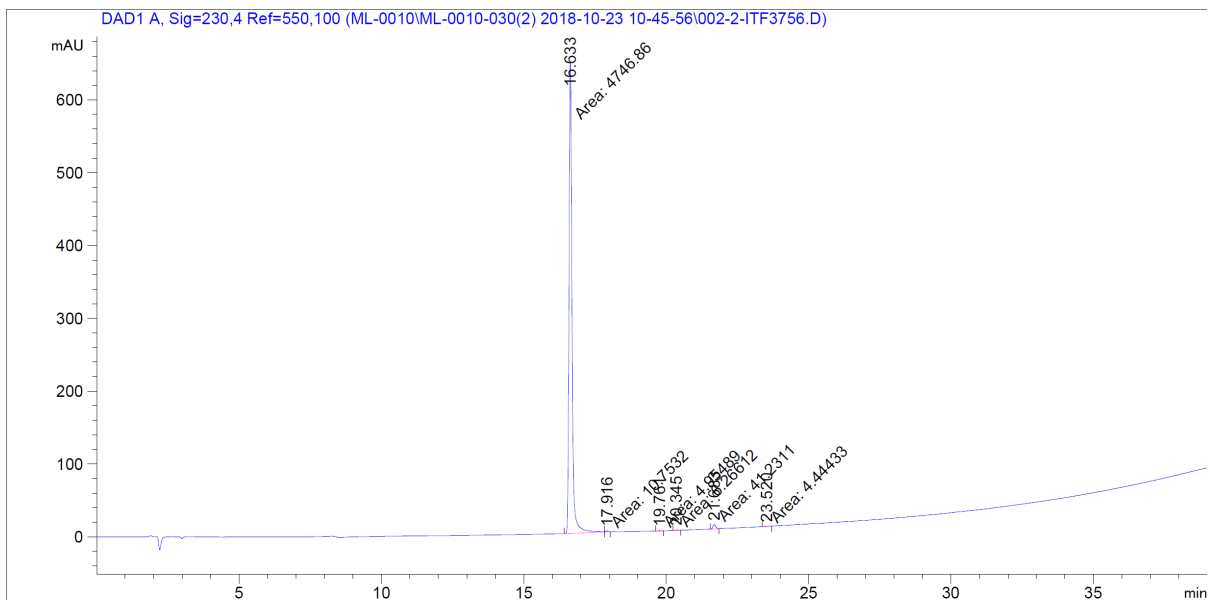

## Area Percent Report

Sorted By : Signal  
Multiplier : 1.0000  
Dilution : 1.0000  
Use Multiplier & Dilution Factor with ISTDs

Signal 1: DAD1 A, Sig=230,4 Ref=550,100

| Peak # | RetTime [min] | Type | Width [min] | Area [mAU*s] | Height [mAU] | Area %  |
|--------|---------------|------|-------------|--------------|--------------|---------|
| 1      | 16.633        | MF   | 0.1217      | 4746.85742   | 650.32465    | 98.5949 |
| 2      | 17.916        | FM   | 0.1213      | 10.75318     | 1.47803      | 0.2233  |
| 3      | 19.761        | MM   | 0.1569      | 4.95489      | 5.26211e-1   | 0.1029  |
| 4      | 20.345        | MM   | 0.1245      | 6.26612      | 8.39117e-1   | 0.1302  |
| 5      | 21.683        | MM   | 0.1185      | 41.23109     | 5.79919      | 0.8564  |
| 6      | 23.520        | MM   | 0.1883      | 4.44433      | 3.93408e-1   | 0.0923  |

Totals : 4814.50704 659.36060

# Compound 43

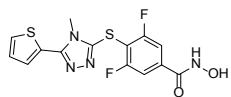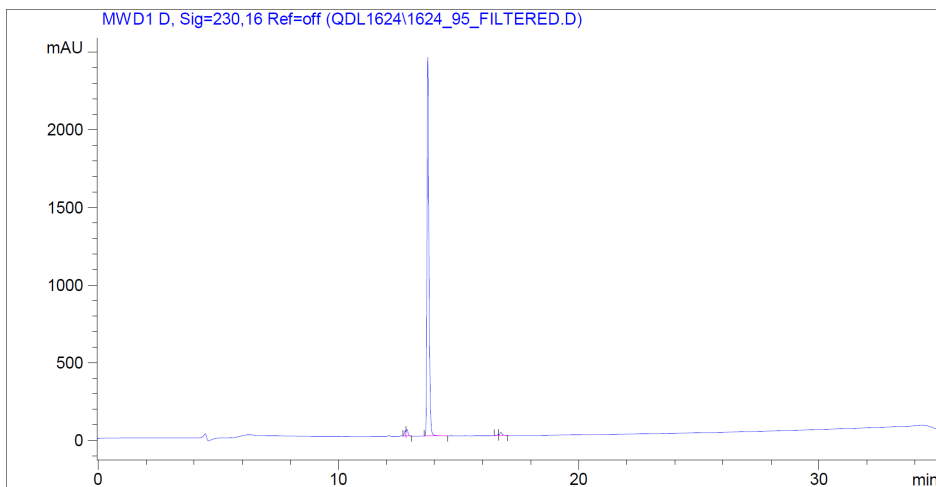

## AREA PERCENT REPORT

Sorted By : Retention Time  
Multiplier : 1.000000  
Dilution : 1.000000  
Use Multiplier & Dilution Factor with ISTDs

Signal 1 : MWD1 D, Sig=230,16 Ref=off

| Peak # | RetTime [min] | Type | Area [mAU*s] | Width [s] | Height [mAU] | Area % |
|--------|---------------|------|--------------|-----------|--------------|--------|
| 1      | 12.765        | VV   | 142.2237     | 0.062     | 34.635       | 0.996  |
| 2      | 12.847        | VB   | 243.4736     | 0.080     | 44.129       | 1.705  |
| 3      | 13.713        | VV   | 1.3720e4     | 0.086     | 2442.290     | 96.064 |
| 4      | 16.632        | BV   | 27.0258      | 0.071     | 5.910        | 0.189  |
| 5      | 16.749        | VB   | 149.4247     | 0.104     | 20.842       | 1.046  |

Totals : 14282.465 2547.806

\*\*\* End of Report \*\*\*

## Compound 44

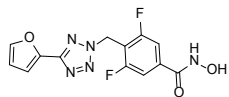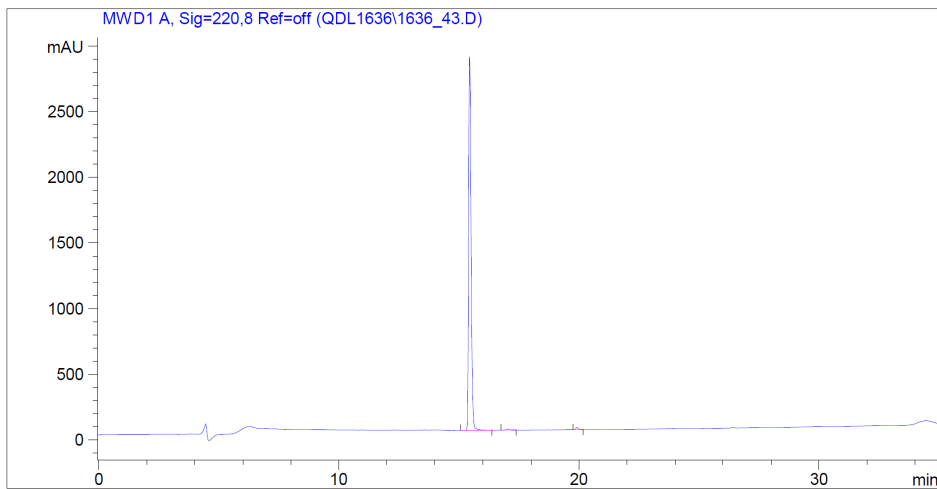

### AREA PERCENT REPORT

Sorted By : Retention Time  
Multiplier : 1.000000  
Dilution : 1.000000  
Use Multiplier & Dilution Factor with ISTDs

Signal 1 : MWD1 A, Sig=220,8 Ref=off

| Peak # | RetTime [min] | Type | Area [mAU*s] | Width [s] | Height [mAU] | Area % |
|--------|---------------|------|--------------|-----------|--------------|--------|
| 1      | 15.439        | BV   | 2.0405e4     | 0.112     | 2847.222     | 98.966 |
| 2      | 17.019        | VB   | 77.4276      | 0.119     | 9.334        | 0.376  |
| 3      | 19.905        | BB   | 135.7432     | 0.112     | 18.491       | 0.658  |

Totals : 20617.825 2875.048

\*\*\* End of Report \*\*\*

# Compound 45

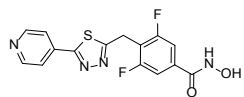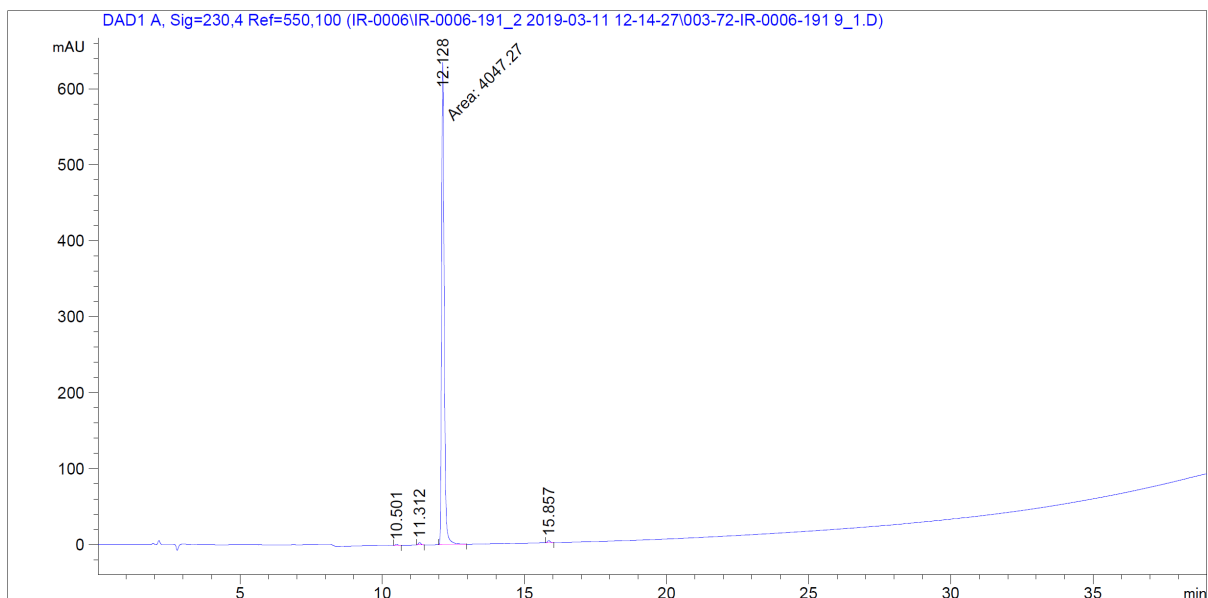

## Area Percent Report

Sorted By : Signal  
Multiplier : 1.0000  
Dilution : 1.0000  
Use Multiplier & Dilution Factor with ISTDs

Signal 1: DAD1 A, Sig=230,4 Ref=550,100

| Peak # | RetTime [min] | Type | Width [min] | Area [mAU*s] | Height [mAU] | Area %  |
|--------|---------------|------|-------------|--------------|--------------|---------|
| 1      | 10.501        | BB   | 0.0938      | 6.83267      | 1.11008      | 0.1669  |
| 2      | 11.312        | BB   | 0.0938      | 21.14806     | 3.43508      | 0.5167  |
| 3      | 12.128        | MM   | 0.1059      | 4047.27197   | 636.98608    | 98.8851 |
| 4      | 15.857        | BB   | 0.0956      | 17.65212     | 2.87751      | 0.4313  |

Totals : 4092.90483 644.40875

\*\*\* End of Report \*\*\*

# Compound 46

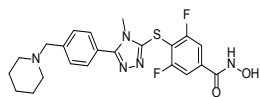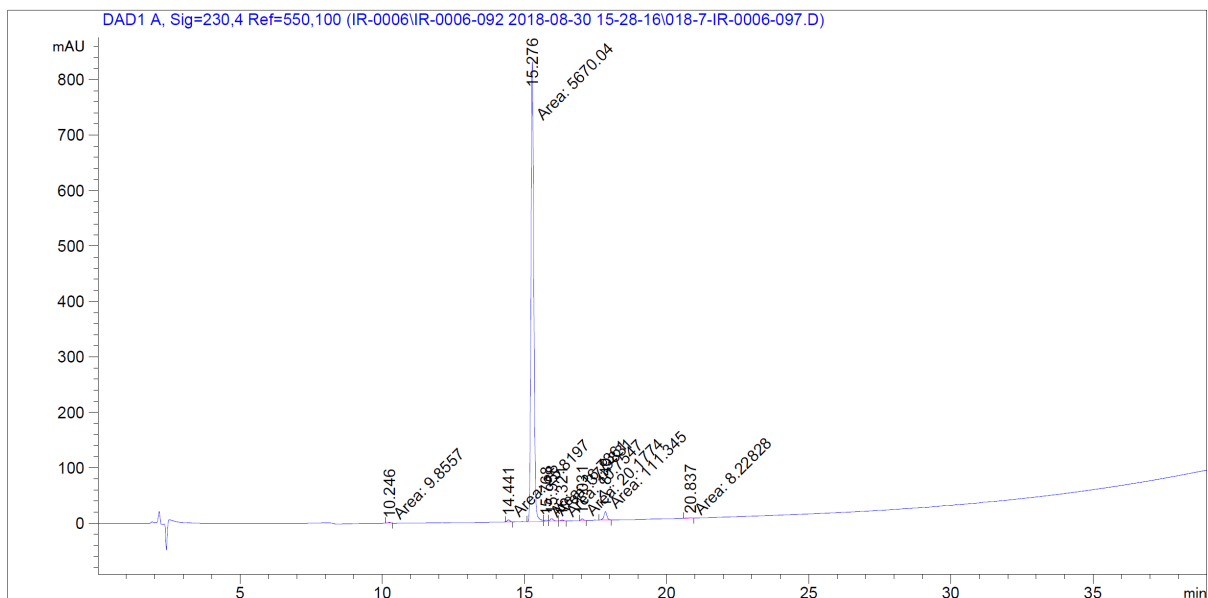

## Area Percent Report

Sorted By : Signal  
Multiplier : 1.0000  
Dilution : 1.0000  
Use Multiplier & Dilution Factor with ISTDs

Signal 1: DAD1 A, Sig=230,4 Ref=550,100

| Peak # | RetTime [min] | Type | Width [min] | Area [mAU*s] | Height [mAU] | Area %  |
|--------|---------------|------|-------------|--------------|--------------|---------|
| 1      | 10.246        | MM   | 0.1214      | 9.85570      | 1.35345      | 0.1667  |
| 2      | 14.441        | MM   | 0.1169      | 25.81969     | 3.68123      | 0.4368  |
| 3      | 15.276        | MF   | 0.1139      | 5670.03955   | 829.62567    | 95.9245 |
| 4      | 15.768        | FM   | 0.1392      | 16.73606     | 2.00368      | 0.2831  |
| 5      | 15.958        | FM   | 0.1398      | 37.98315     | 4.52803      | 0.6426  |
| 6      | 16.321        | FM   | 0.1110      | 10.75467     | 1.61549      | 0.1819  |
| 7      | 17.031        | MM   | 0.1052      | 20.17744     | 3.19765      | 0.3414  |
| 8      | 17.849        | MM   | 0.1235      | 111.34515    | 15.02161     | 1.8837  |
| 9      | 20.837        | MM   | 0.2144      | 8.22828      | 4.97986e-1   | 0.1392  |

Totals : 5910.93969 861.52480



# Compound 47

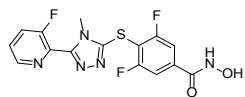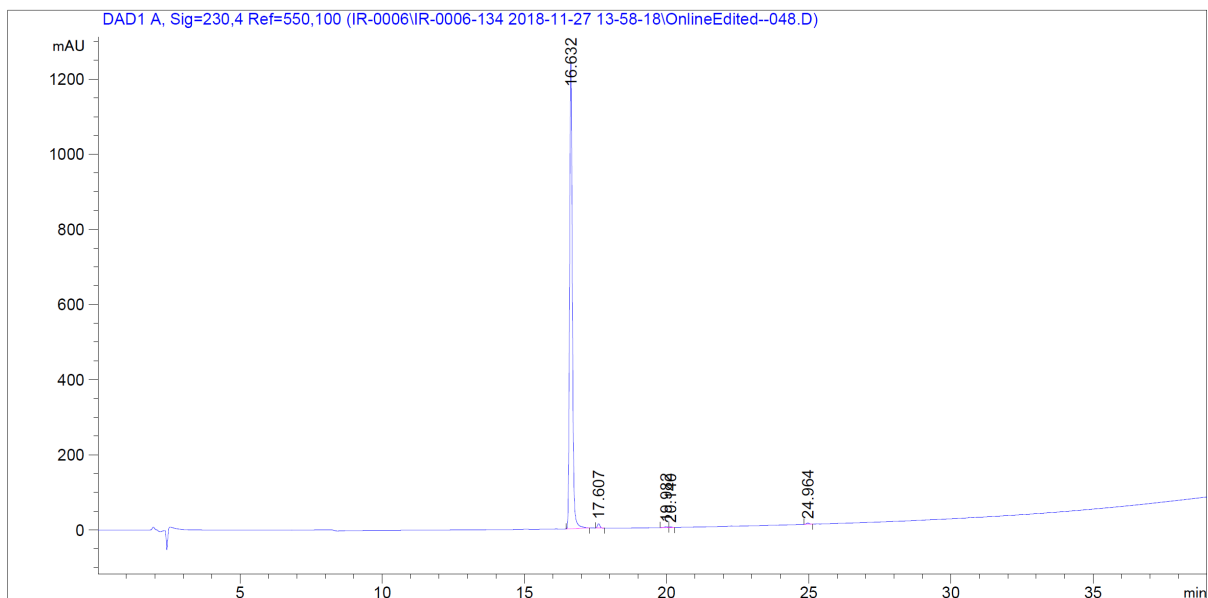

## Area Percent Report

Sorted By : Signal  
Multiplier : 1.0000  
Dilution : 1.0000  
Use Multiplier & Dilution Factor with ISTDs

Signal 1: DAD1 A, Sig=230,4 Ref=550,100

| Peak # | RetTime [min] | Type | Width [min] | Area [mAU*s] | Height [mAU] | Area %  |
|--------|---------------|------|-------------|--------------|--------------|---------|
| 1      | 16.632        | BB   | 0.1059      | 8536.11914   | 1246.60913   | 98.5507 |
| 2      | 17.607        | BB   | 0.0962      | 73.10281     | 11.81493     | 0.8440  |
| 3      | 19.982        | BV   | 0.1227      | 19.25979     | 2.32263      | 0.2224  |
| 4      | 20.140        | VB   | 0.0995      | 10.28613     | 1.54806      | 0.1188  |
| 5      | 24.964        | BB   | 0.1070      | 22.88335     | 3.29540      | 0.2642  |

Totals : 8661.65123 1265.59016

# Compound 48

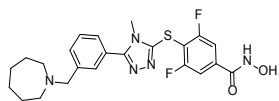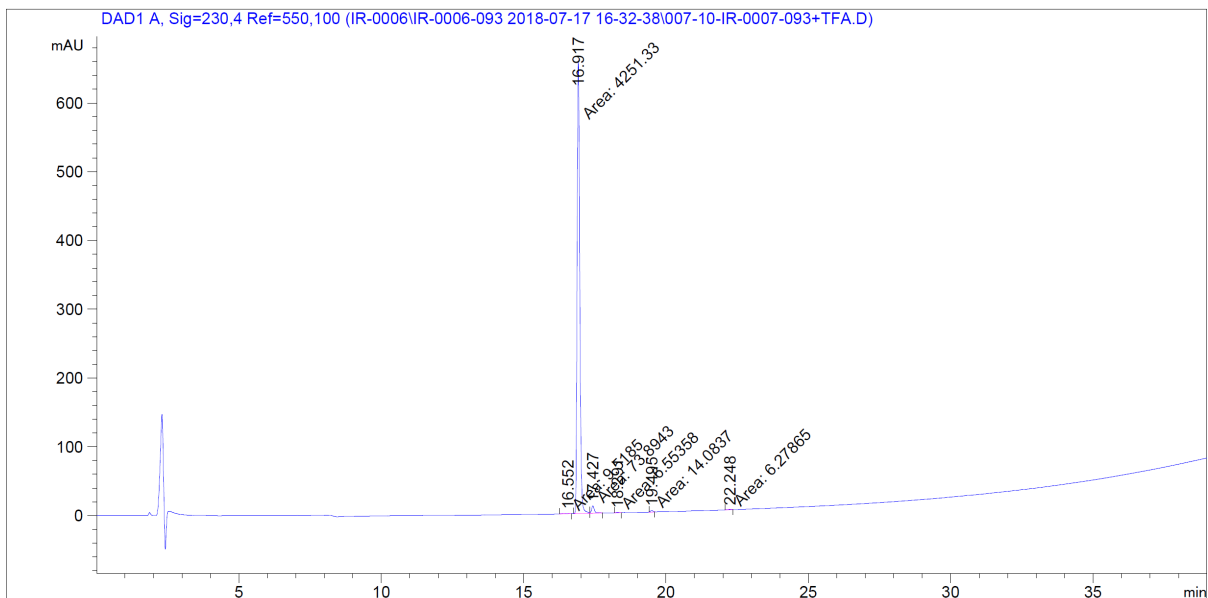

## Area Percent Report

Sorted By : Signal  
Multiplier : 1.0000  
Dilution : 1.0000  
Use Multiplier & Dilution Factor with ISTDs

Signal 1: DAD1 A, Sig=230,4 Ref=550,100

| Peak # | RetTime [min] | Type | Width [min] | Area [mAU*s] | Height [mAU] | Area %  |
|--------|---------------|------|-------------|--------------|--------------|---------|
| 1      | 16.552        | MM   | 0.2451      | 9.51850      | 6.47343e-1   | 0.2182  |
| 2      | 16.917        | MF   | 0.1075      | 4251.33350   | 658.83563    | 97.4705 |
| 3      | 17.427        | FM   | 0.1160      | 73.89431     | 10.61377     | 1.6942  |
| 4      | 18.291        | MM   | 0.1224      | 6.55358      | 8.92673e-1   | 0.1503  |
| 5      | 19.495        | MM   | 0.1005      | 14.08372     | 2.33581      | 0.3229  |
| 6      | 22.248        | MM   | 0.1673      | 6.27865      | 6.25553e-1   | 0.1440  |

Totals : 4361.66227 673.95077

# Compound 49

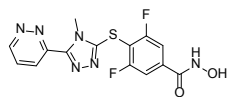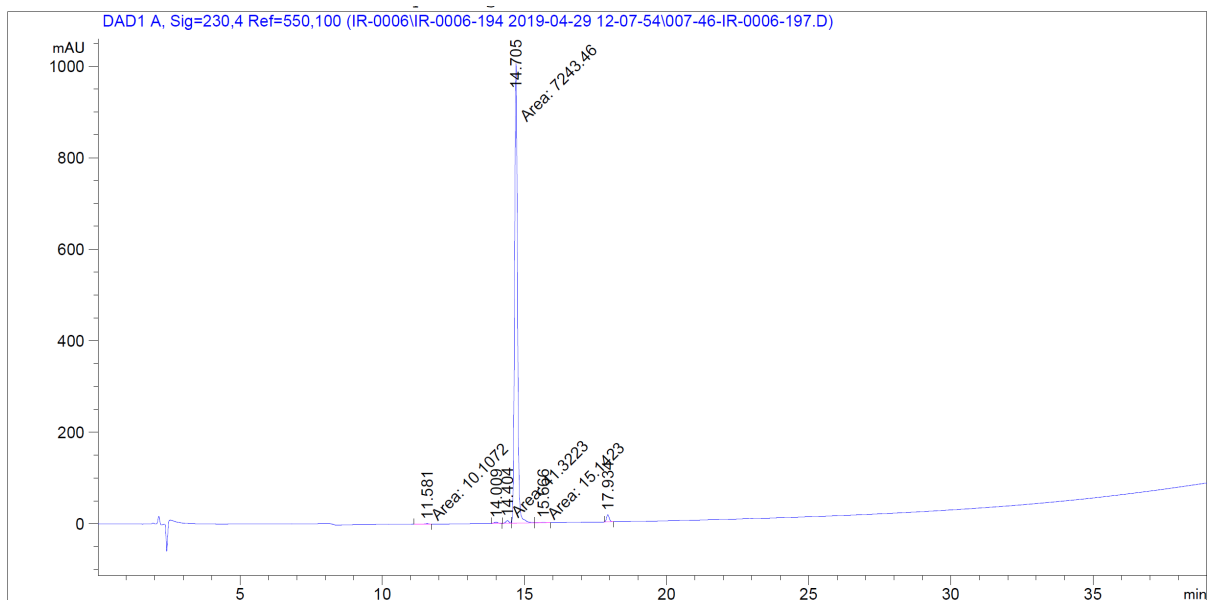

## Area Percent Report

Sorted By : Signal  
Multiplier : 1.0000  
Dilution : 1.0000  
Use Multiplier & Dilution Factor with ISTDs

Signal 1: DAD1 A, Sig=230,4 Ref=550,100

| Peak # | RetTime [min] | Type | Width [min] | Area [mAU*s] | Height [mAU] | Area %  |
|--------|---------------|------|-------------|--------------|--------------|---------|
| 1      | 11.581        | MM   | 0.1920      | 10.10718     | 8.77479e-1   | 0.1360  |
| 2      | 14.009        | BV   | 0.1380      | 23.20093     | 2.76172      | 0.3121  |
| 3      | 14.404        | MF   | 0.1244      | 41.32228     | 5.53506      | 0.5558  |
| 4      | 14.705        | FM   | 0.1201      | 7243.45898   | 1005.46704   | 97.4330 |
| 5      | 15.666        | FM   | 0.3124      | 15.14232     | 8.07779e-1   | 0.2037  |
| 6      | 17.934        | BB   | 0.0991      | 101.06865    | 15.70725     | 1.3595  |

Totals : 7434.30035 1031.15633
